# Supplementary material for: Upscaling dryland carbon and water fluxes with artificial neural networks of optical, thermal, and microwave satellite remote sensing
Source: Copernicus journal article supplement (doi:10.5194/bg-2022-186), 2022-09-30
Supplement: Supplementary file 1 [file bg-2022-186-supplement.pdf]

## Supplementary Materials

### **Upscaling dryland carbon and water fluxes with artificial neural networks of optical, thermal, and microwave satellite remote sensing**

Matthew P. Dannenberg<sup>1</sup>, Mallory L. Barnes<sup>2</sup>, William K. Smith<sup>3</sup>, Miriam R. Johnston<sup>1</sup>, Susan K. Meerdink<sup>1</sup>, Xian Wang<sup>2,3</sup>, Russell L. Scott<sup>4</sup>, Joel A. Biederman<sup>4</sup>

<sup>1</sup>Department of Geographical and Sustainability Sciences, University of Iowa, Iowa City IA 52245, USA

<sup>2</sup>O'Neill School of Public and Environmental Affairs, Indiana University, Bloomington IN 47405, USA

<sup>3</sup>School of Natural Resources and the Environment, University of Arizona, Tucson AZ 85721, USA

<sup>4</sup>Southwest Watershed Research Center, Agricultural Research Service, U.S. Department of Agriculture, Tucson AZ 85719, USA

*Correspondence to:* Matthew P. Dannenberg (matthew-dannenberg@uiowa.edu)

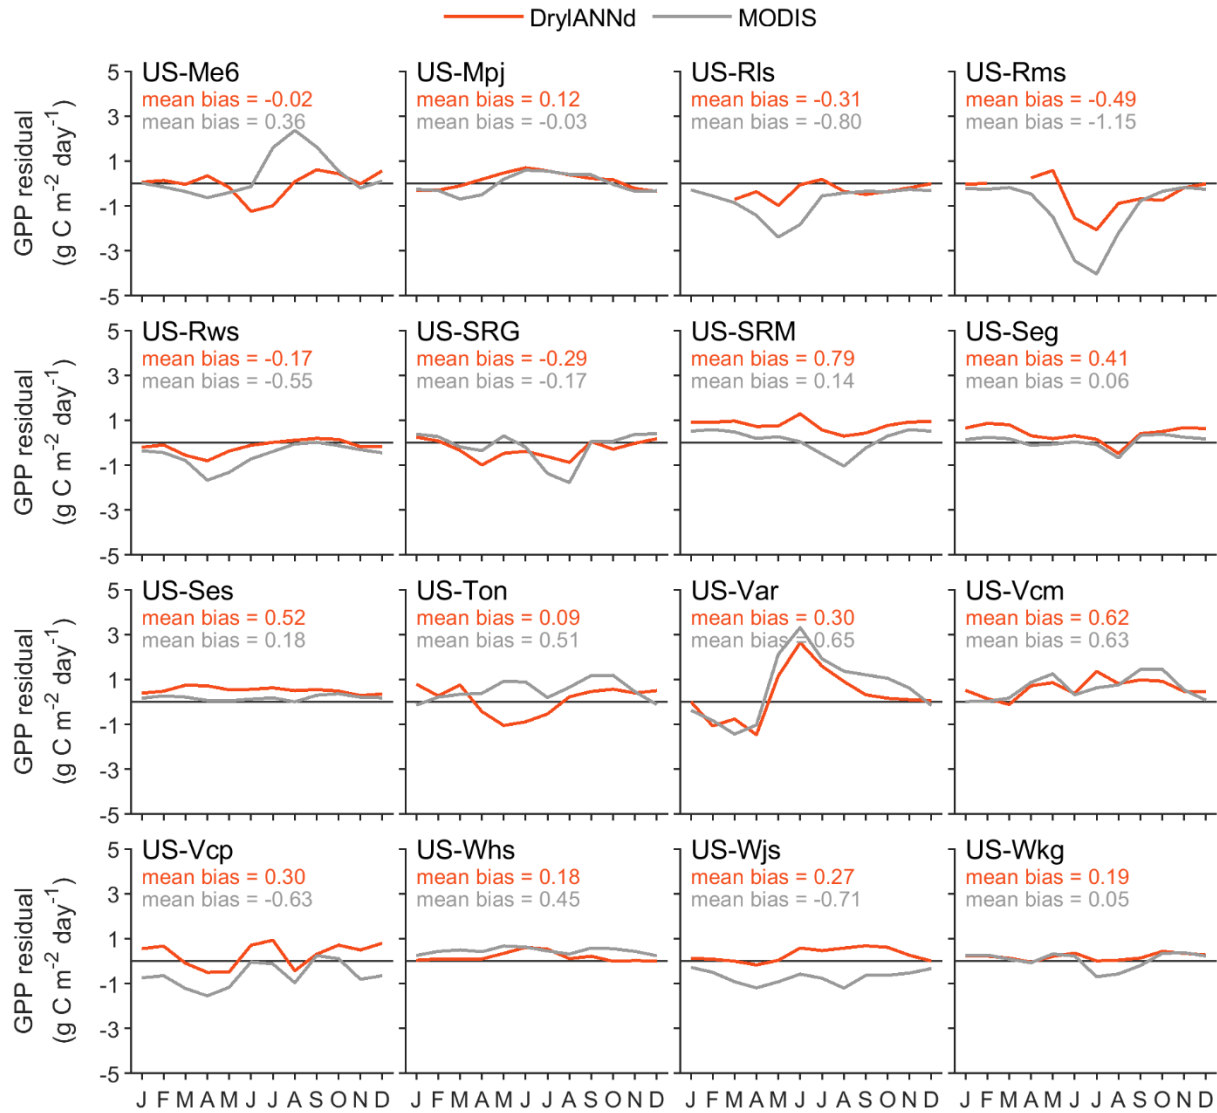

**Figure S1.** Residual between the mean seasonality of observed GPP vs. DrylANNd GPP (red) and MODIS GPP (gray) at the sixteen sites with complete flux records. Monthly means were estimated using all available observations during the period 2015-2020. Mean bias is the average of the residuals across the full calendar year.

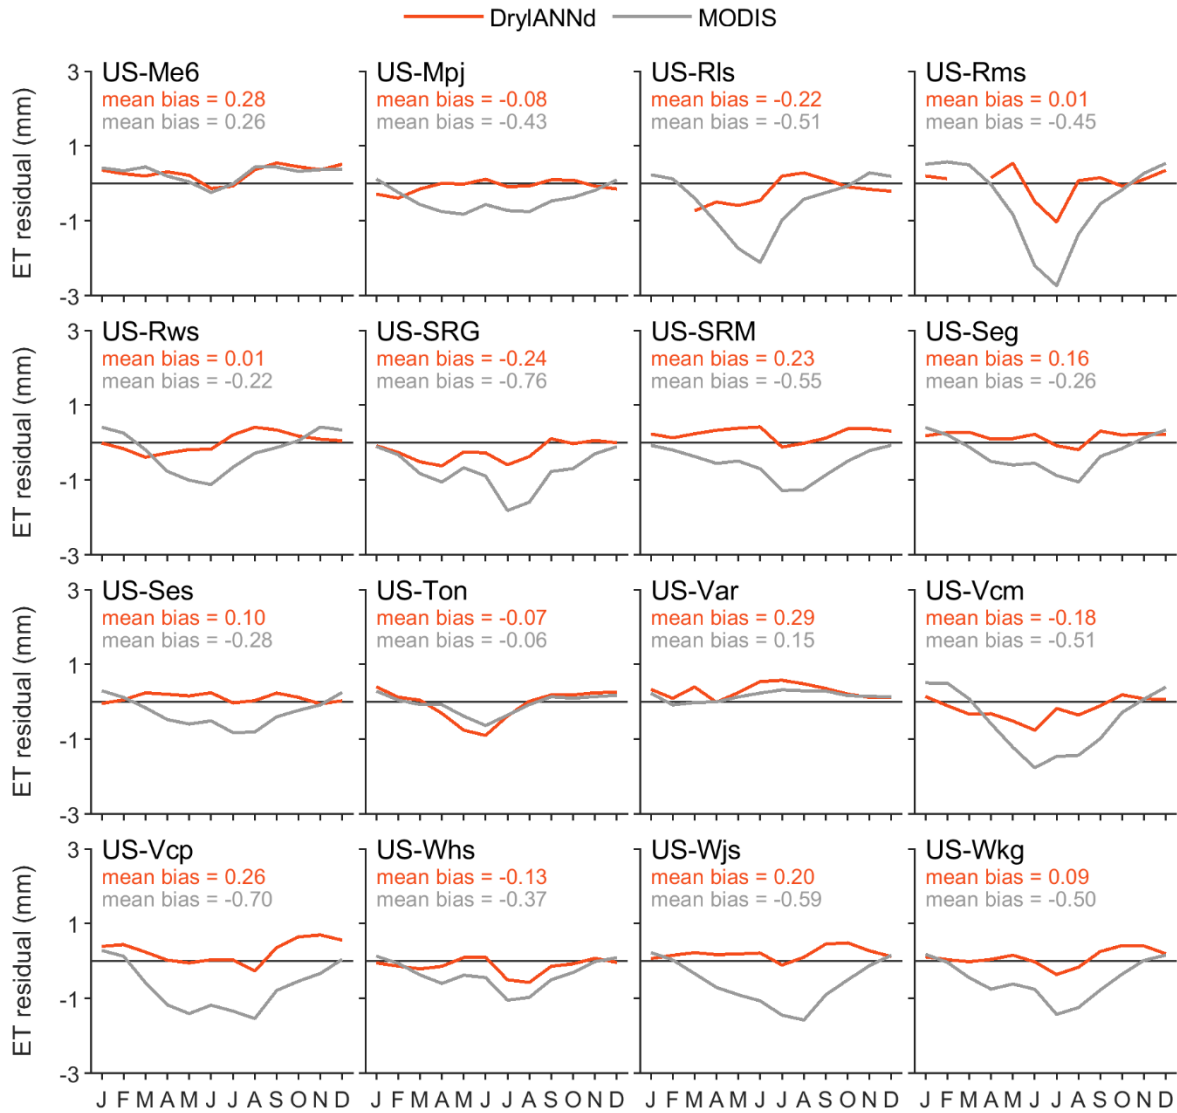

**Figure S2. Residual between the mean seasonality of observed ET vs. DrylANNd ET (red) and MODIS ET (gray) at the sixteen sites with complete flux records. Monthly means were estimated using all available observations during the period 2015-2020. Mean bias is the average of the residuals across the full calendar year.**

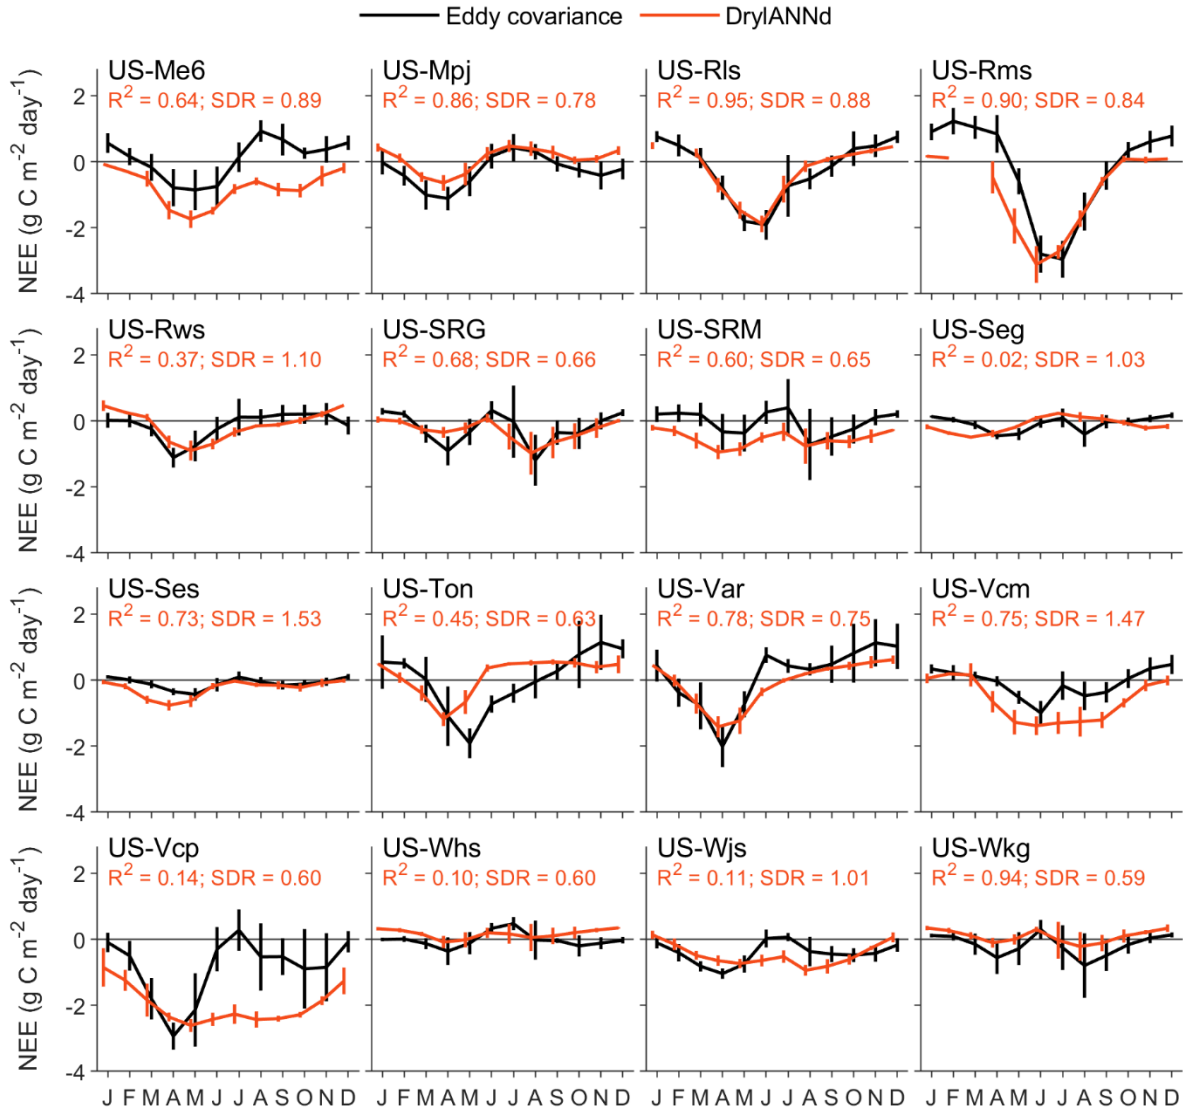

**Figure S3.** Mean ( $\pm 1$  standard deviation) seasonality of eddy covariance NEE (black) and DrylANNd NEE (red) at the sixteen sites with complete flux records. Monthly means and standard deviations were estimated using all available observations during the period 2015-2020. Standard deviation ratio (SDR) $<1$  indicates that the model underestimated the magnitude of seasonal variability and SDR $>1$  indicates that the model overestimated the magnitude of seasonal variability.

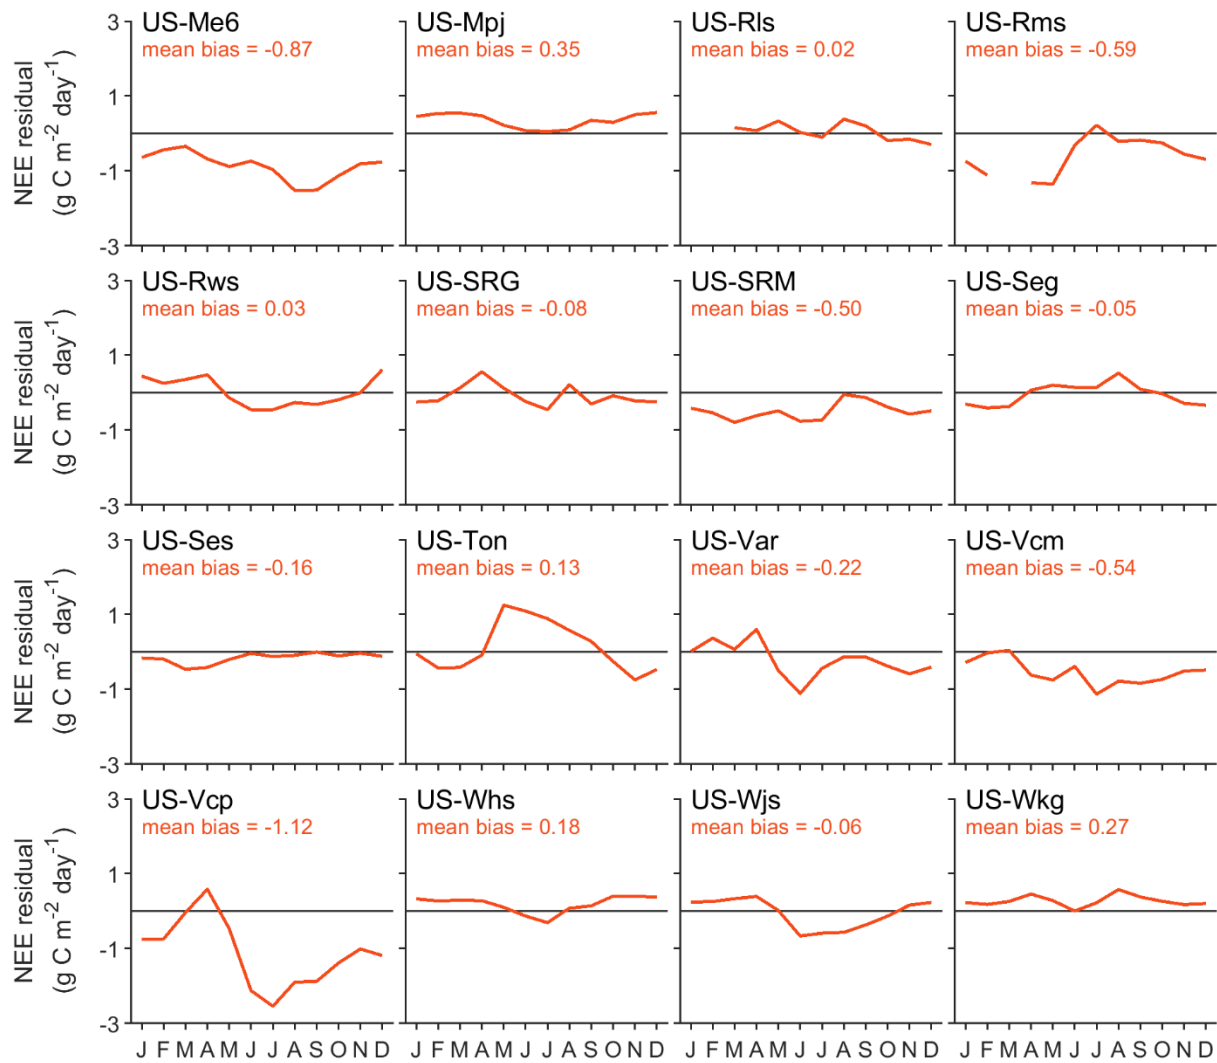

**Figure S4.** Residual between the mean seasonality of observed NEE vs. DrylANNd NEE at the sixteen sites with complete flux records. Monthly means were estimated using all available observations during the period 2015-2020. Mean bias is the average of the residuals across the full calendar year.

**Table S1. AmeriFlux sites used for DrylANNd model calibration and validation. Aridity is the ratio of mean annual precipitation to mean annual potential evapotranspiration from the TerraClimate database.**

| Site_ID | Name                                                          | Lat   | Lon     | Aridity | Biome | Elev (m) | Start | End  |
|---------|---------------------------------------------------------------|-------|---------|---------|-------|----------|-------|------|
| US-CZ2  | Sierra Critical Zone: Ponderosa Pine Forest, Soaproot Saddle  | 37.03 | -119.26 | 0.57    | ENF   | 1160     | 2010  | 2016 |
| US-CZ3  | Sierra Critical Zone: Sierran Mixed Conifer, P301             | 37.07 | -119.20 | 0.74    | ENF   | 2015     | 2008  | 2016 |
| US-Hn2  | Hanford 100H grassland                                        | 46.69 | -119.46 | 0.13    | GRS   | 117.5    | 2015  | 2018 |
| US-Hn3  | Hanford 100H sagebrush                                        | 46.69 | -119.46 | 0.13    | SHB   | 120.9    | 2017  | 2018 |
| US-Jo2  | Jornada Experimental Range Mixed Shrubland                    | 32.58 | -106.60 | 0.17    | SHB   | 1469     | 2010  | 2019 |
| US-KLS  | Kansas Land Institute                                         | 38.77 | -97.57  | 0.62    | GRS   | 373      | 2012  | 2017 |
| US-Me6  | Metolius Young Pine Burn                                      | 44.32 | -121.61 | 0.55    | ENF   | 998      | 2010  | 2020 |
| US-Mpj  | Mountainair Pinyon-Juniper Woodland                           | 34.44 | -106.24 | 0.29    | SAV   | 2196     | 2008  | 2019 |
| US-MtB  | Mt Bigelow                                                    | 32.42 | -110.73 | 0.45    | ENF   | 2573     | 2009  | 2019 |
| US-Rls  | RCEW Low Sagebrush                                            | 43.14 | -116.74 | 0.34    | SHB   | 1608     | 2014  | 2018 |
| US-Rms  | RCEW Mountain Big Sagebrush                                   | 43.06 | -116.75 | 0.45    | SHB   | 2111     | 2014  | 2018 |
| US-Rwf  | RCEW Upper Sheep Prescribed Fire                              | 43.12 | -116.72 | 0.44    | SHB   | 1878     | 2014  | 2018 |
| US-Rws  | Reynolds Creek Wyoming big sagebrush                          | 43.17 | -116.71 | 0.26    | SHB   | 1425     | 2014  | 2018 |
| US-SCg  | Southern California Climate Gradient: Grassland               | 33.74 | -117.69 | 0.28    | GRS   | 465      | 2006  | 2016 |
| US-SCs  | Southern California Climate Gradient: Coastal Sage            | 33.73 | -117.70 | 0.28    | SHB   | 470      | 2006  | 2016 |
| US-SCw  | Southern California Climate Gradient: Pinyon/Juniper Woodland | 33.60 | -116.45 | 0.19    | SHB   | 1281     | 2006  | 2016 |
| US-Seg  | Sevilleta grassland                                           | 34.36 | -106.70 | 0.33    | GRS   | 1596     | 2007  | 2019 |
| US-Ses  | Sevilleta shrubland                                           | 34.33 | -106.74 | 0.26    | SHB   | 1593     | 2007  | 2019 |
| US-SRG  | Santa Rita Grassland                                          | 31.79 | -110.83 | 0.26    | GRS   | 1291     | 2008  | 2020 |
| US-SRM  | Santa Rita Mesquite                                           | 31.82 | -110.87 | 0.16    | SAV   | 1120     | 2003  | 2020 |
| US-SRS  | Santa Rita Experimental Range Mesquite Savanna                | 31.82 | -110.85 | 0.16    | SAV   | 1169     | 2011  | 2018 |
| US-Ton  | Tonzi Ranch                                                   | 38.43 | -120.97 | 0.45    | SAV   | 177      | 2001  | 2020 |
| US-Var  | Vaira Ranch                                                   | 38.41 | -120.95 | 0.46    | GRS   | 129      | 2000  | 2020 |
| US-Vcm  | Valles Caldera Mixed Conifer                                  | 35.89 | -106.53 | 0.85    | ENF   | 3030     | 2007  | 2019 |
| US-Vcp  | Valles Caldera Ponderosa Pine                                 | 35.86 | -106.60 | 0.63    | ENF   | 2500     | 2007  | 2019 |
| US-Whs  | Walnut Gulch Lucky Hills Shrub                                | 31.74 | -110.05 | 0.20    | SHB   | 1370     | 2007  | 2020 |
| US-Wjs  | Willard Juniper Savannah                                      | 34.43 | -105.86 | 0.23    | SAV   | 1931     | 2007  | 2019 |
| US-Wkg  | Walnut Gulch Kendall Grasslands                               | 31.74 | -109.94 | 0.23    | GRS   | 1531     | 2004  | 2020 |
